# Supplementary material for: Simulating PM2.5 Concentrations during New Year in Cuenca, Ecuador: Effects of Advancing the Time of Burning Activities
Source: MDPI journal article supplement (doi:10.3390/toxics10050264), 2022-05-19
Supplement: s1 [file s1]

# Supplementary Materials: Simulating PM<sub>2.5</sub> Concentrations during New Year in Cuenca, Ecuador: Effects of Advancing the Time of Burning Activities

René Parra, Claudia Saud and Claudia Espinoza

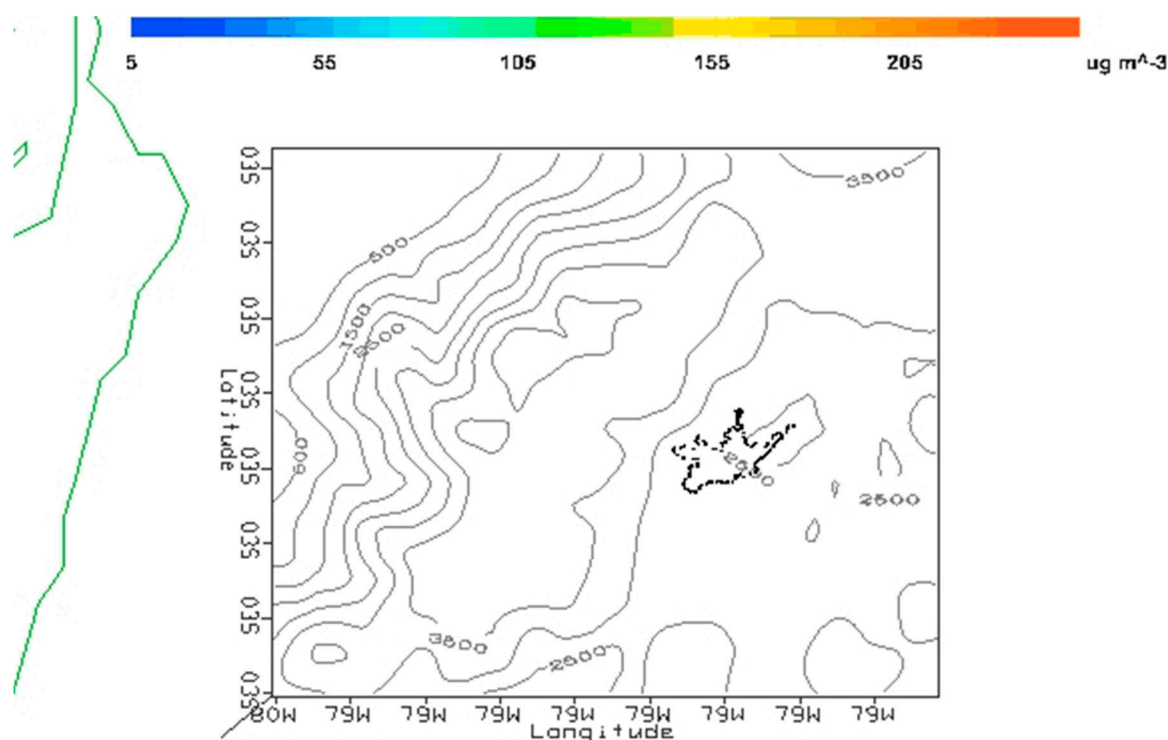

**Figure S1.** Modeled PM<sub>2.5</sub> dispersion on 31 December 2021–1 January 2022. Emission beginning at 1 January 2022 00:00 LT.

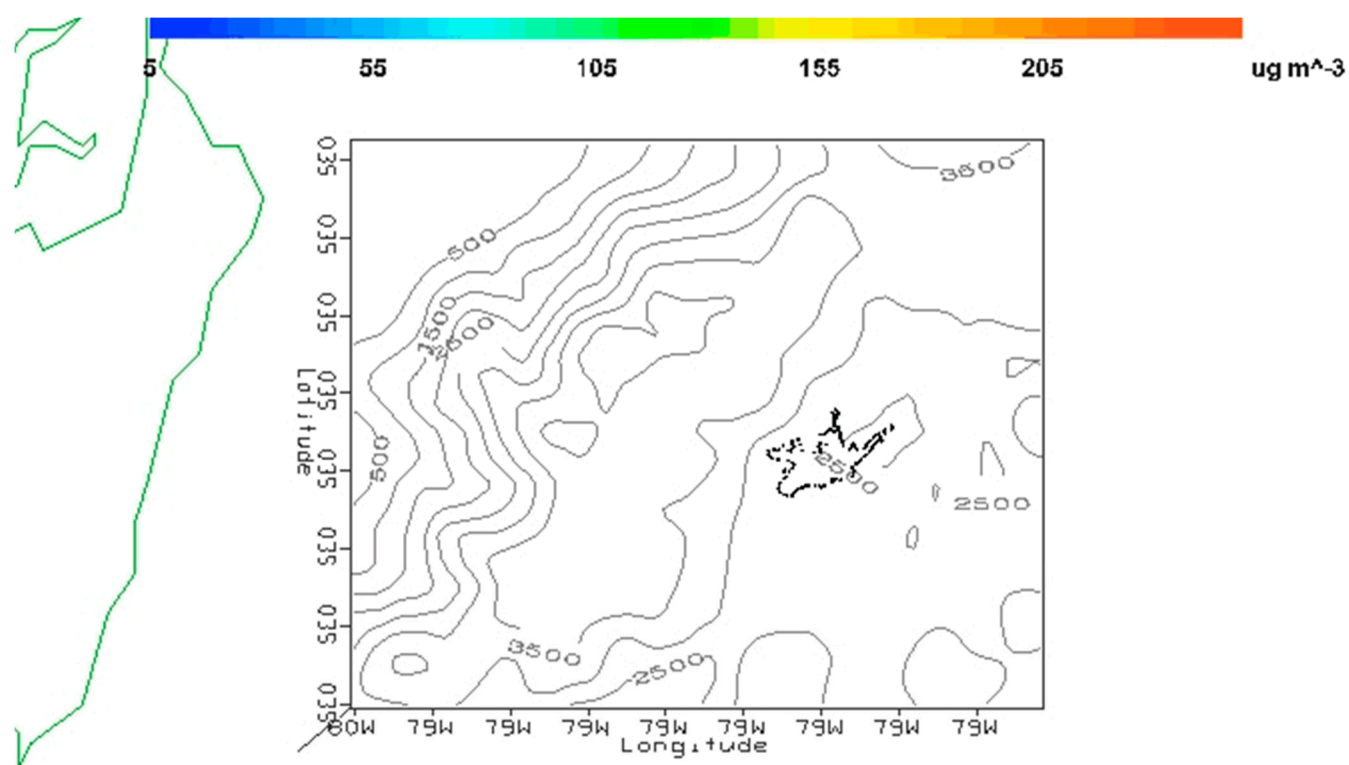

**Figure S2.** Modeled PM<sub>2.5</sub> dispersion on 31 December 2021–1 January 2022. Emission beginning at 31 December 2021 21:00 LT.

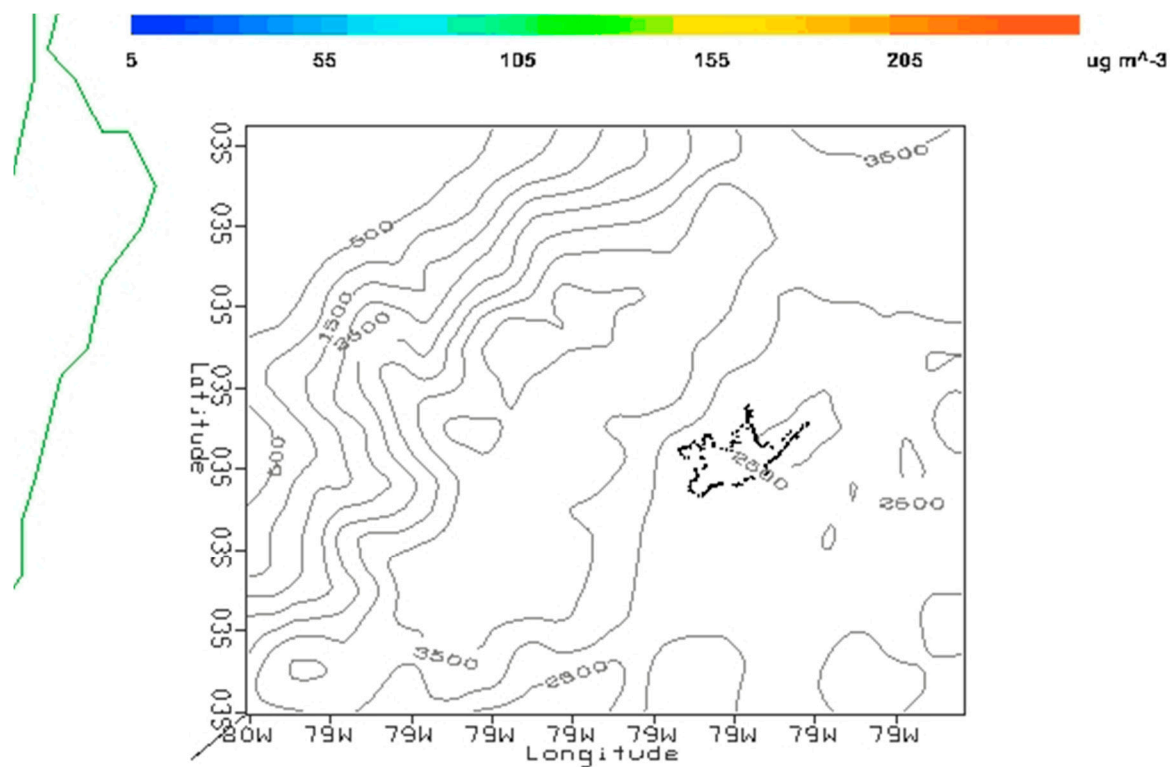

**Figure S3.** Modeled PM<sub>2.5</sub> dispersion on 31 December 2021–1 January 2022. Emission beginning at 31 December 2021 18:00 LT.
